# Supplementary material for: Chromogenic and fluorogenic multianalyte detection with a tuned receptor: refining selectivity for toxic anions and nerve agents
Source: Royal Society of Chemistry journal article supplement (doi:10.1039/c6ra07080a), 2016-01-01

## Supporting information

### **Chromogenic and fluorogenic multianalyte detection with a tuned receptor: Refining selectivity for toxic anions and nerve agents**

Vinod Kumar\*, Hemlata Rana, G. Raviraju, Praphat Garg, Anuradha Baghel and A. K. Gupta

*Defence Research and Development Establishment, Jhansi Road, Gwalior 474002, MP, India. E-mail: vkpal77@yahoo.co.in. Tel.: +91-751-2390203; fax: +91-751-2341148.*

| <b>Contents</b>                                                                        | <b>Page</b> |
|----------------------------------------------------------------------------------------|-------------|
| 1. $^1\text{H}$ NMR spectra and $^{13}\text{C}$ NMR spectra of receptor <b>2</b> ..... | S2          |
| 2. HRMS of receptor <b>2</b> (ESI positive mode).....                                  | S3          |
| 3. $^1\text{H}$ NMR spectra and $^{13}\text{C}$ NMR spectra of receptor <b>3</b> ..... | S4          |
| 4. HRMS of receptor <b>3</b> (ESI positive mode).....                                  | S5          |
| 5. Gas Generation Chamber .....                                                        | S6          |

**<sup>1</sup>H NMR spectrum of 2 (DMSO-*d*<sub>6</sub>)**

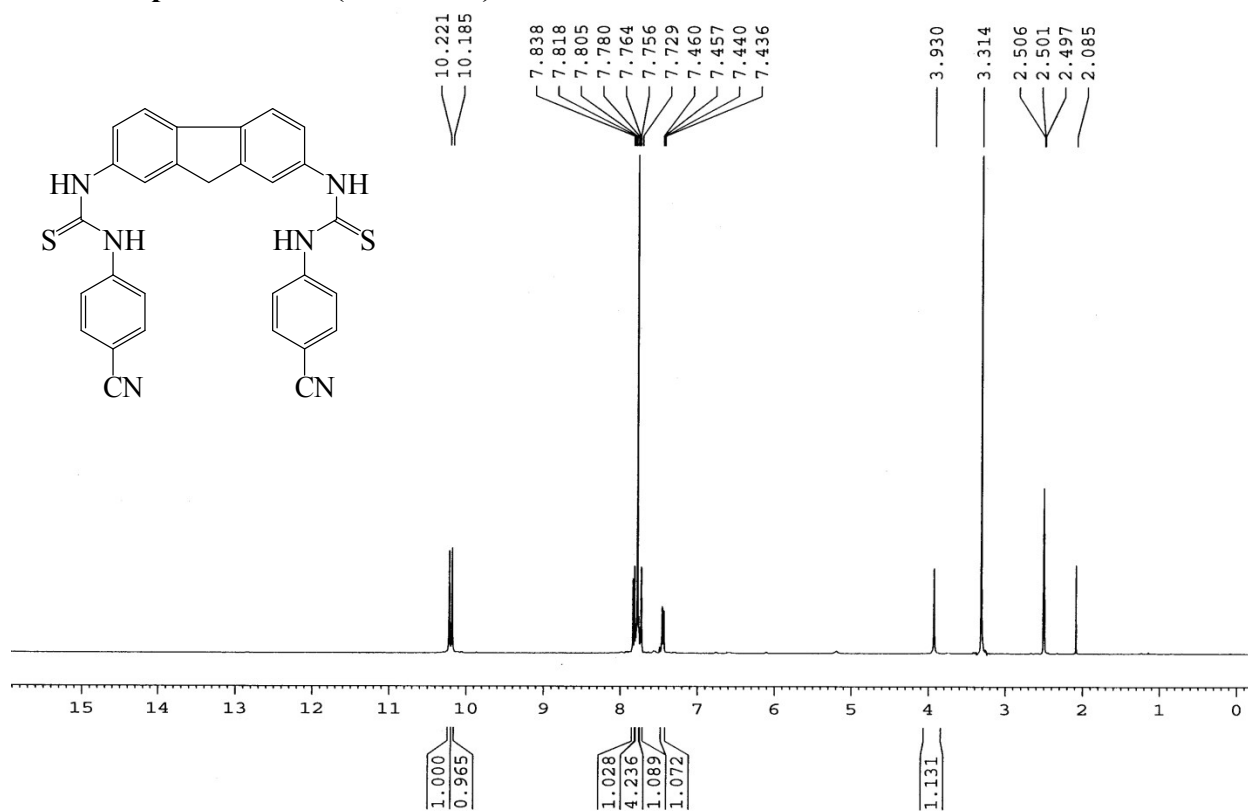

**<sup>13</sup>C NMR spectrum of 2 (DMSO-*d*<sub>6</sub>)**

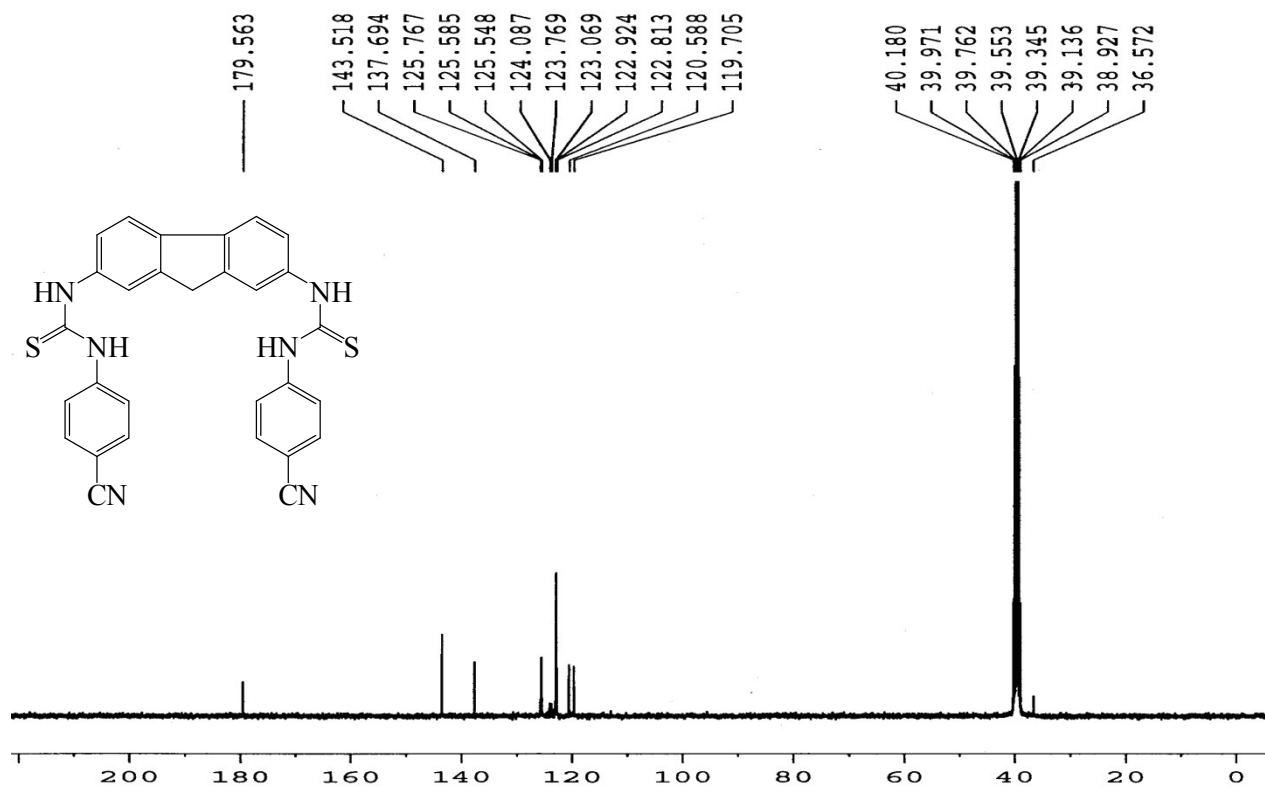

# HRMS of receptor 2 (ESI Positive mode)

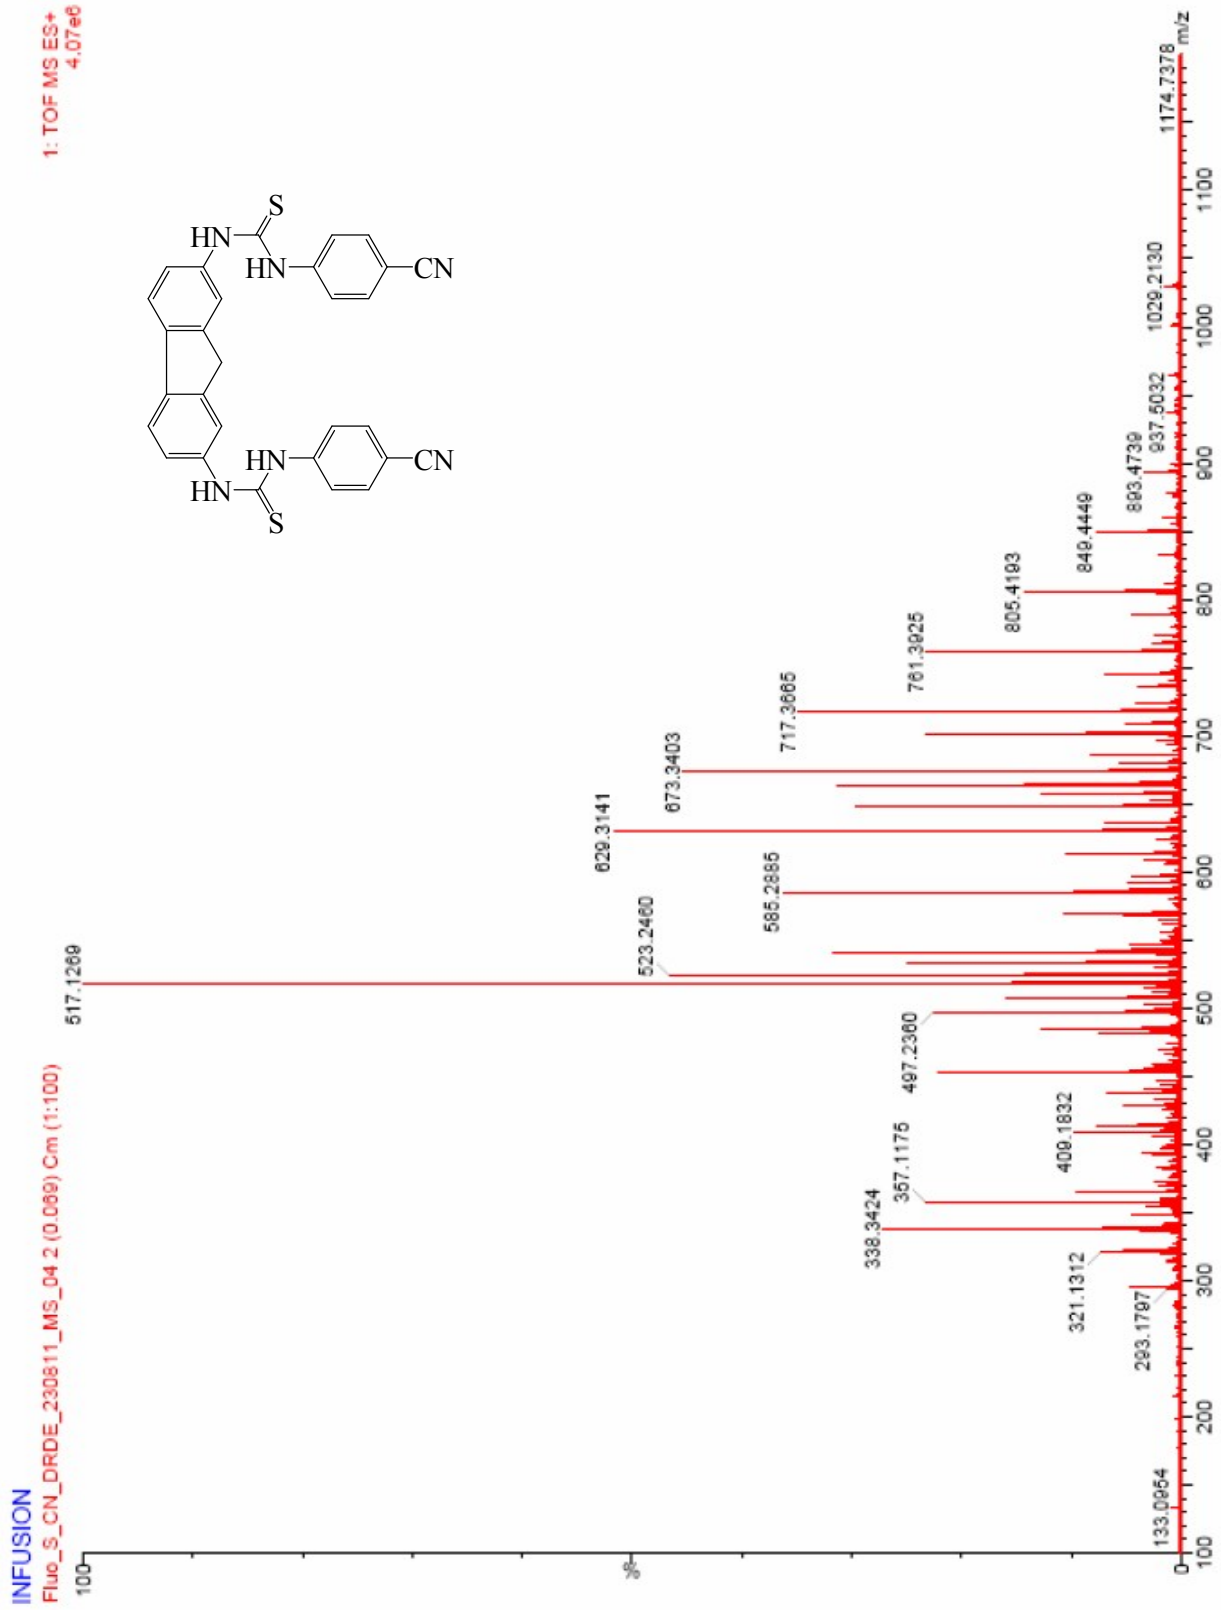

**<sup>1</sup>H NMR spectrum of 3 (DMSO-*d*<sub>6</sub>)**

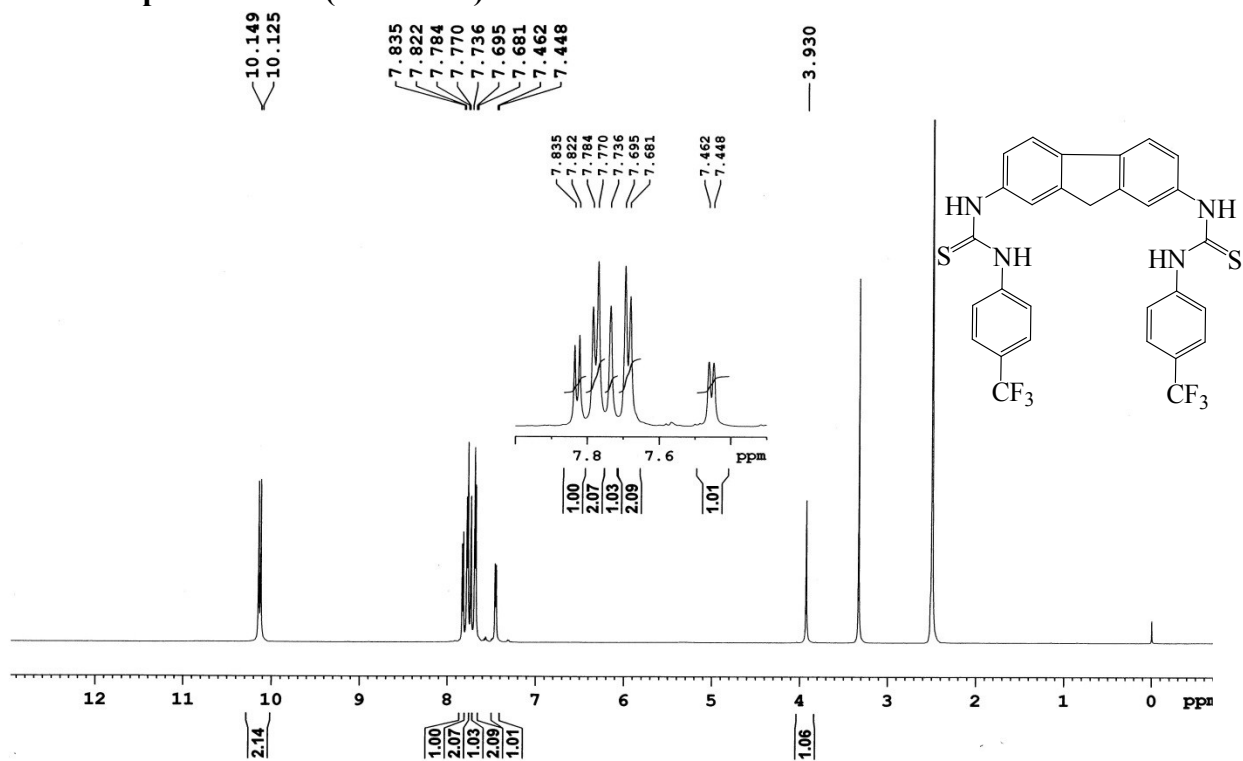

**<sup>13</sup>C NMR spectrum of 3 (DMSO-*d*<sub>6</sub>)**

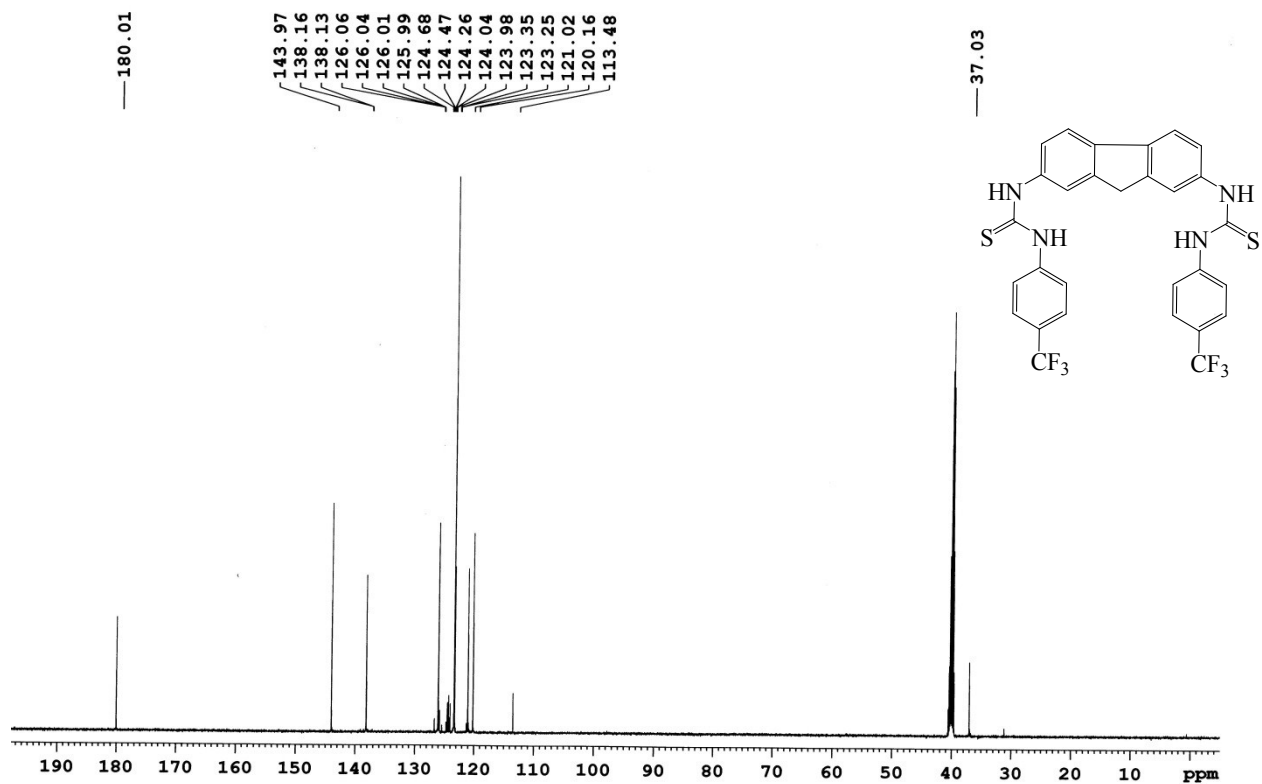

**HRMS of receptor**

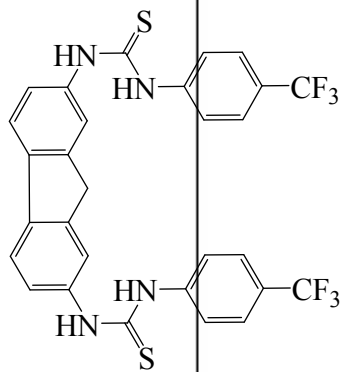

**Gas generation chamber**

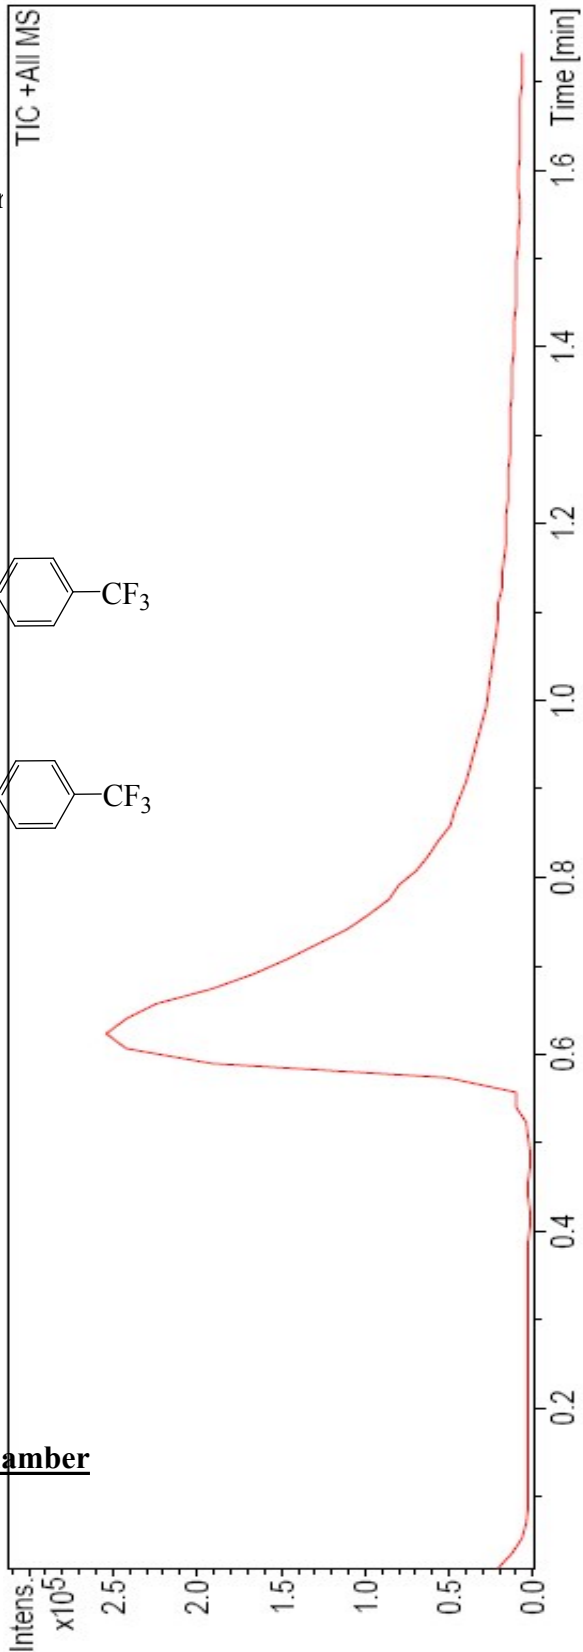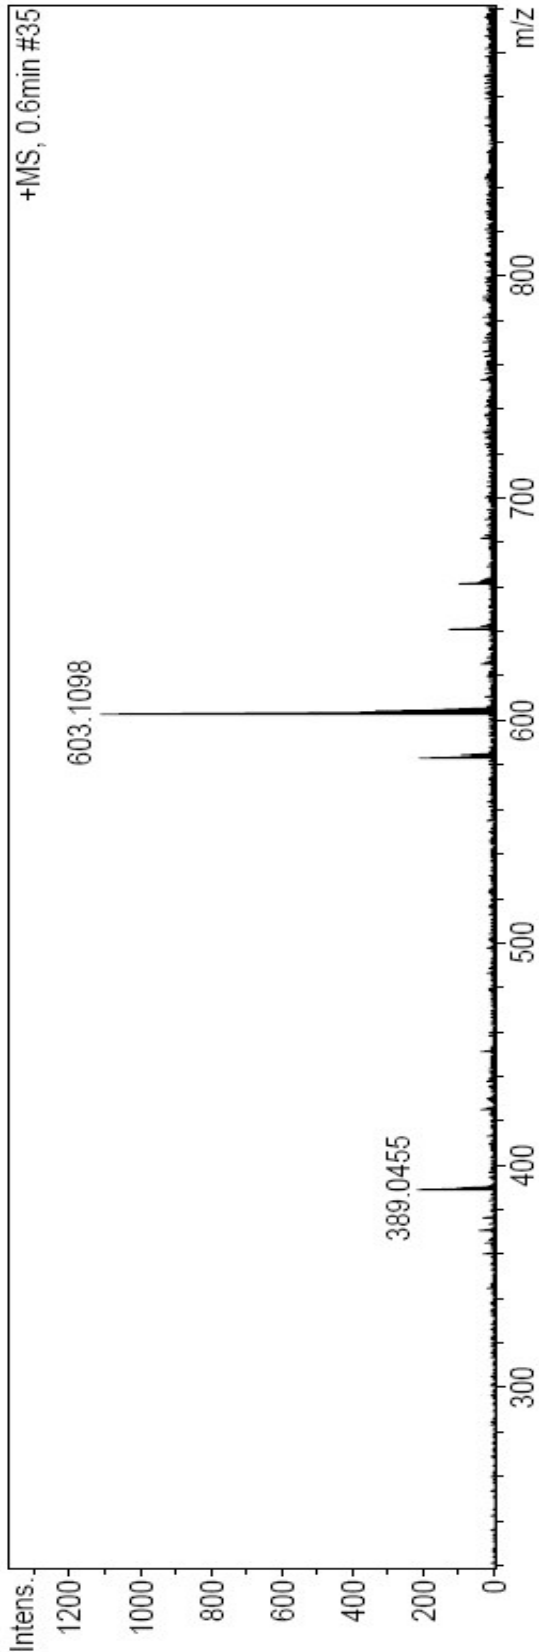

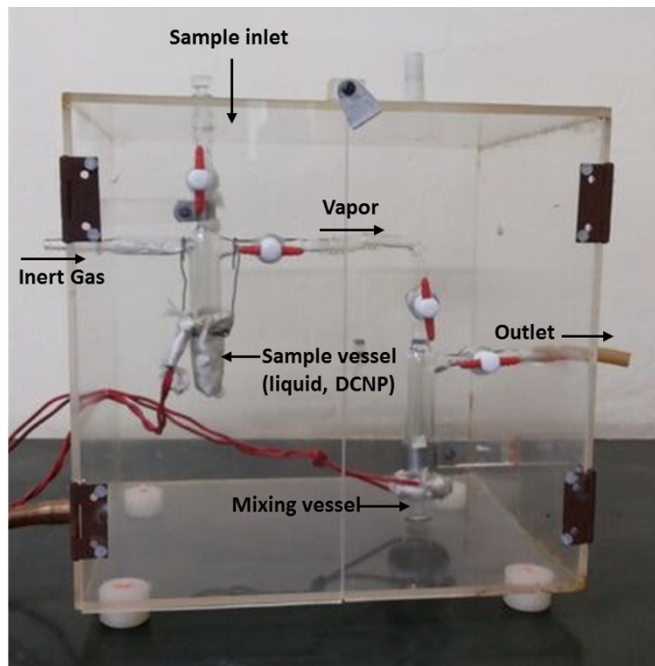

Supplement: c6ra07080a1.pdf [file c6ra07080a1.pdf]
